# Supplementary material for: Competition between FLS and DFR regulates the distribution of flavonols and proanthocyanidins in Rubus chingii Hu
Source: Frontiers journal article supplement (doi:10.3389/fpls.2023.1134993), 2023-03-08
Supplement: Data_Sheet_2.pdf [file Data_Sheet_2.pdf]

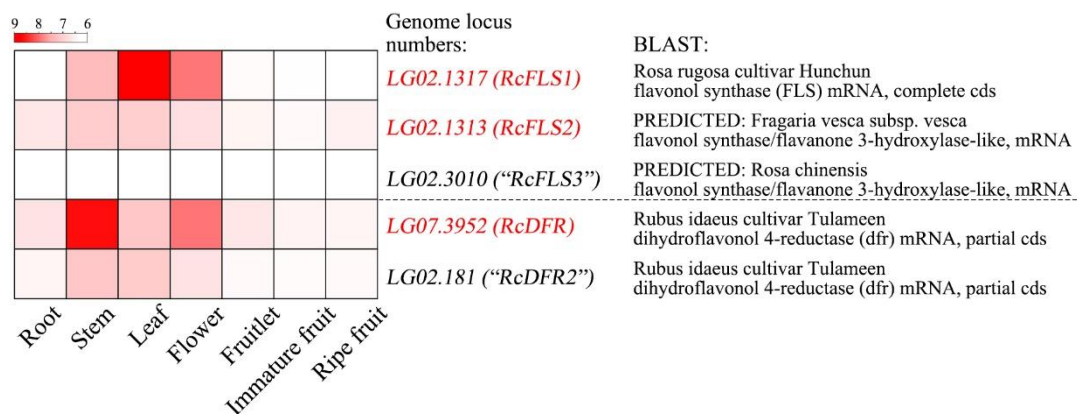

**Figure S1. All homologs of *FLS* and *DFR* encoding genes in the *R. chingii* genome.**

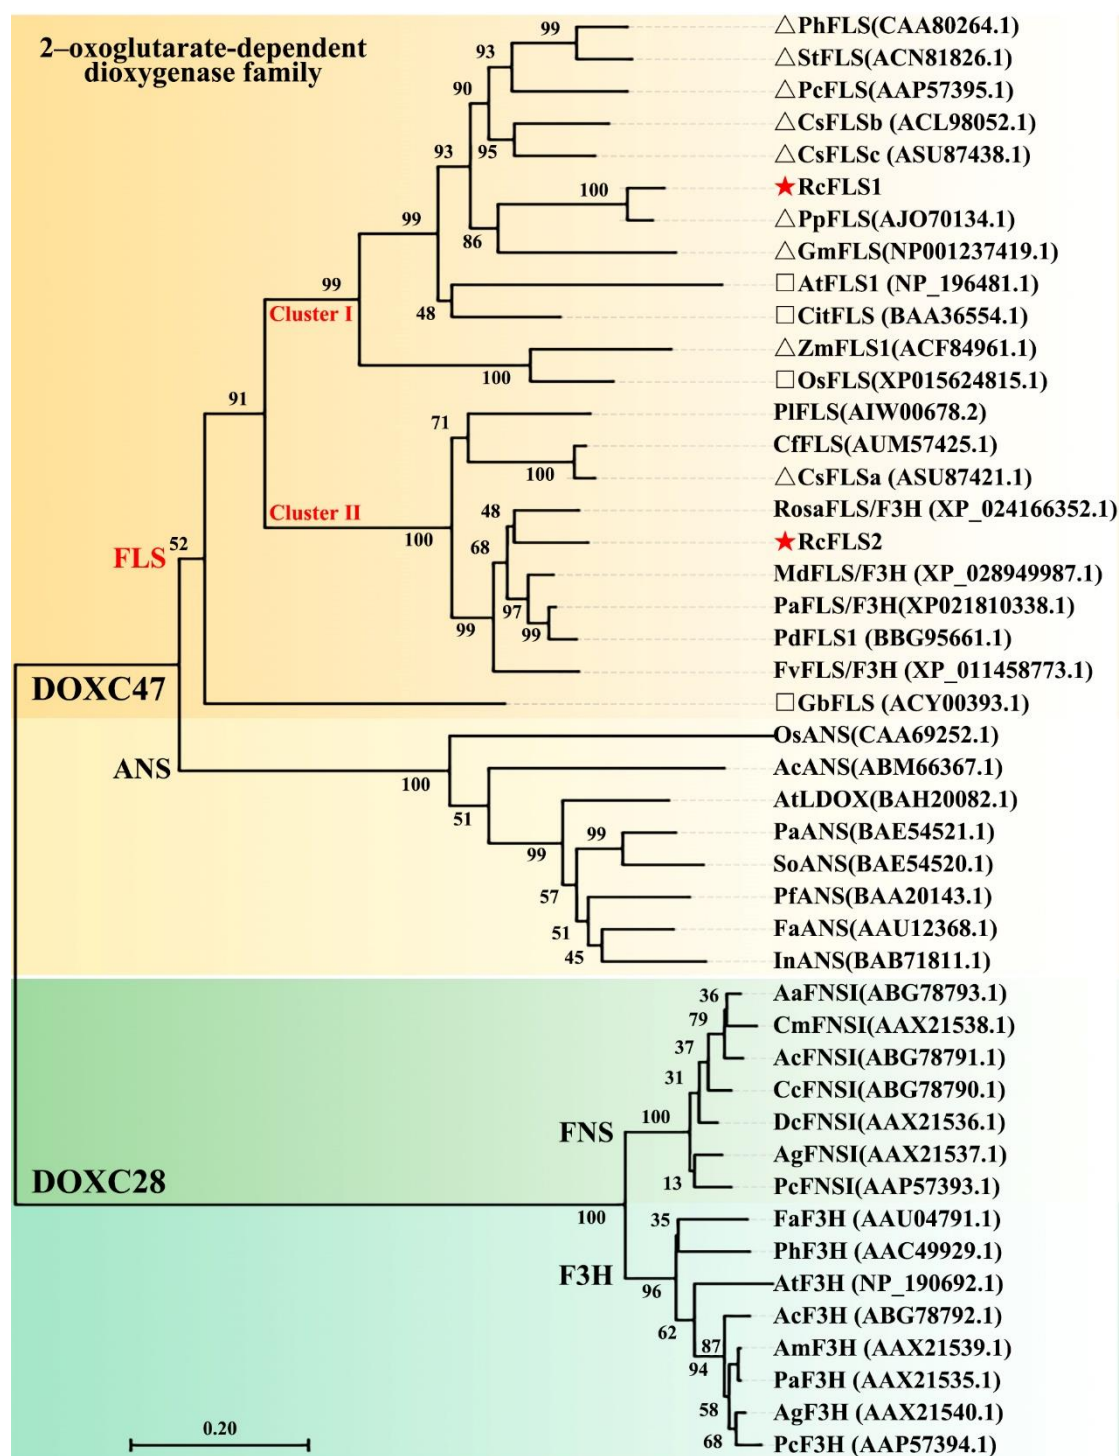

**Figure S2. Phylogeny of flavonoid pathway 2-ODDs, including FLS, ANS, FNS, and F3H.**

The phylogenetic tree was constructed using the MEGA7 software with neighbor-joining method. The DOXC47 clade is on a yellow background, and the DOXC28 clade is on a green background. The FLS subclade is divided into two clusters, indicated in red font. Triangle-labeled FLS genes were reported to have flavonol synthase (FLS) activity, and square-labeled FLS genes were reported to have both flavonol synthase (FLS) and flavanone 3-hydroxylase (F3H) activities.

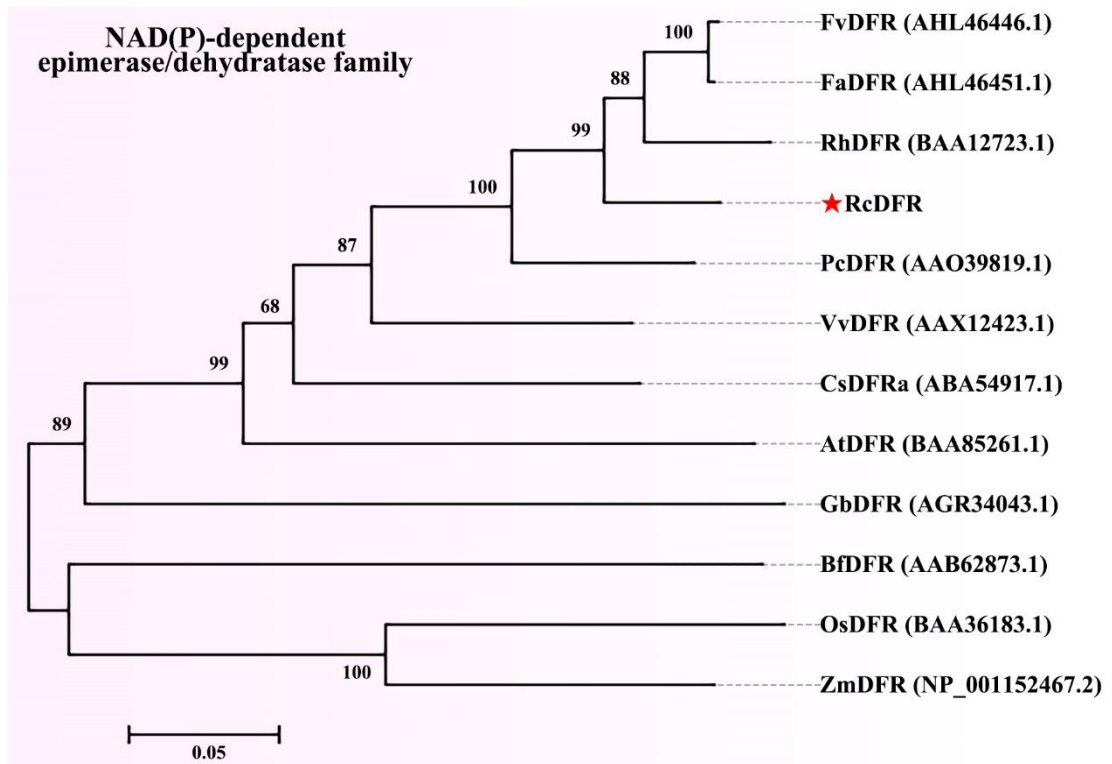

**Figure S3. Phylogenetic tree of RcDFR and other DFRs from different plant species.**

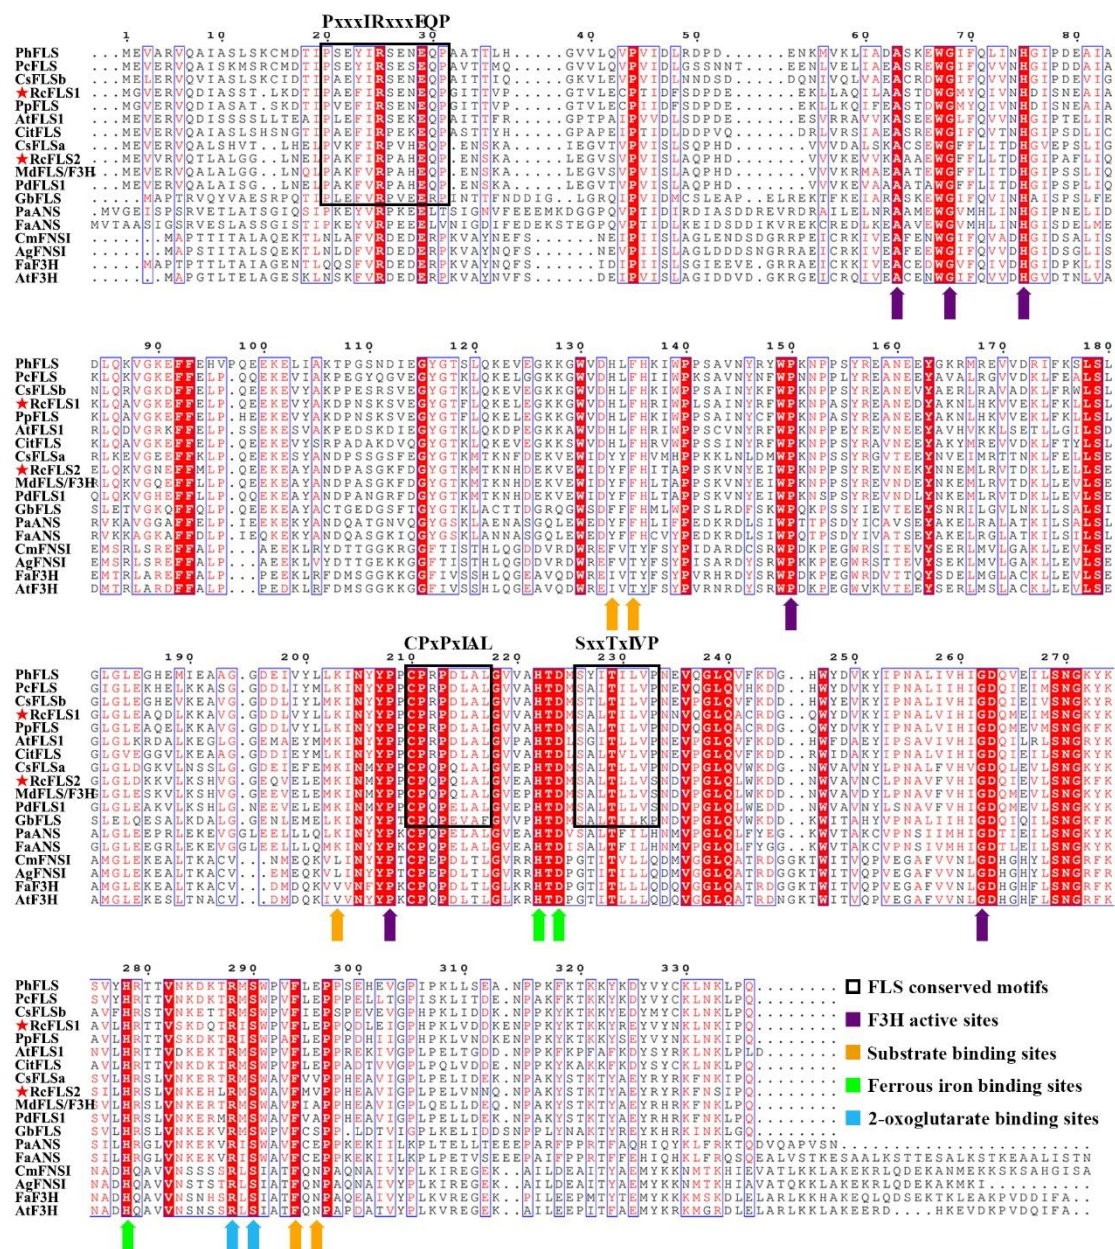



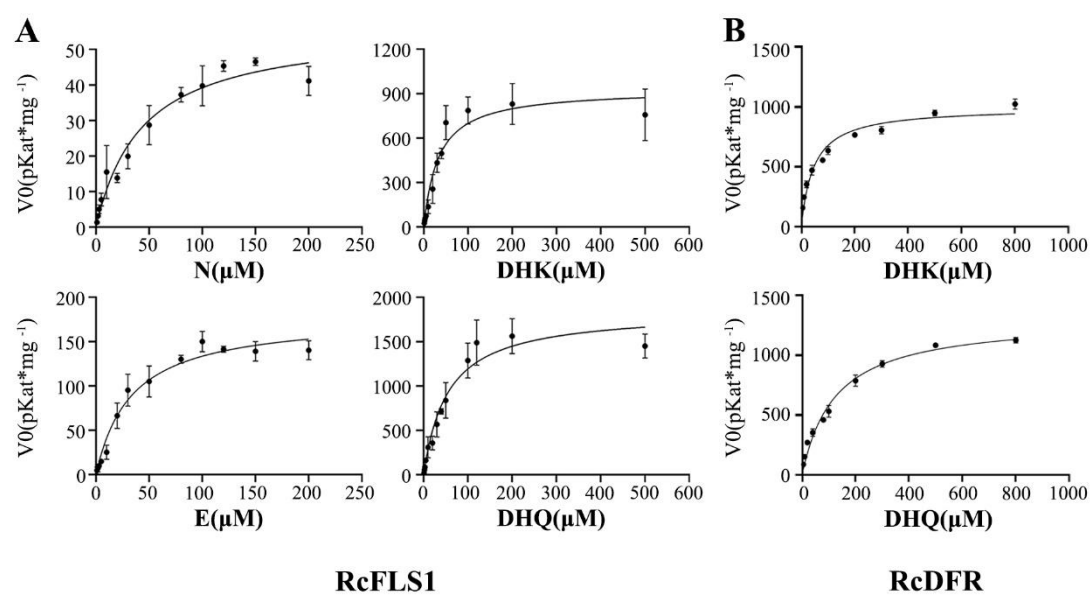

**Figure S5. The Michaelis-Menten equation curve of recombinant RcFLS1 and RcDFR proteins.**

The graph was plotted using Prism 8 software. The Michaelis-Menten constant was determined by averaging values from fitting three separate data sets.

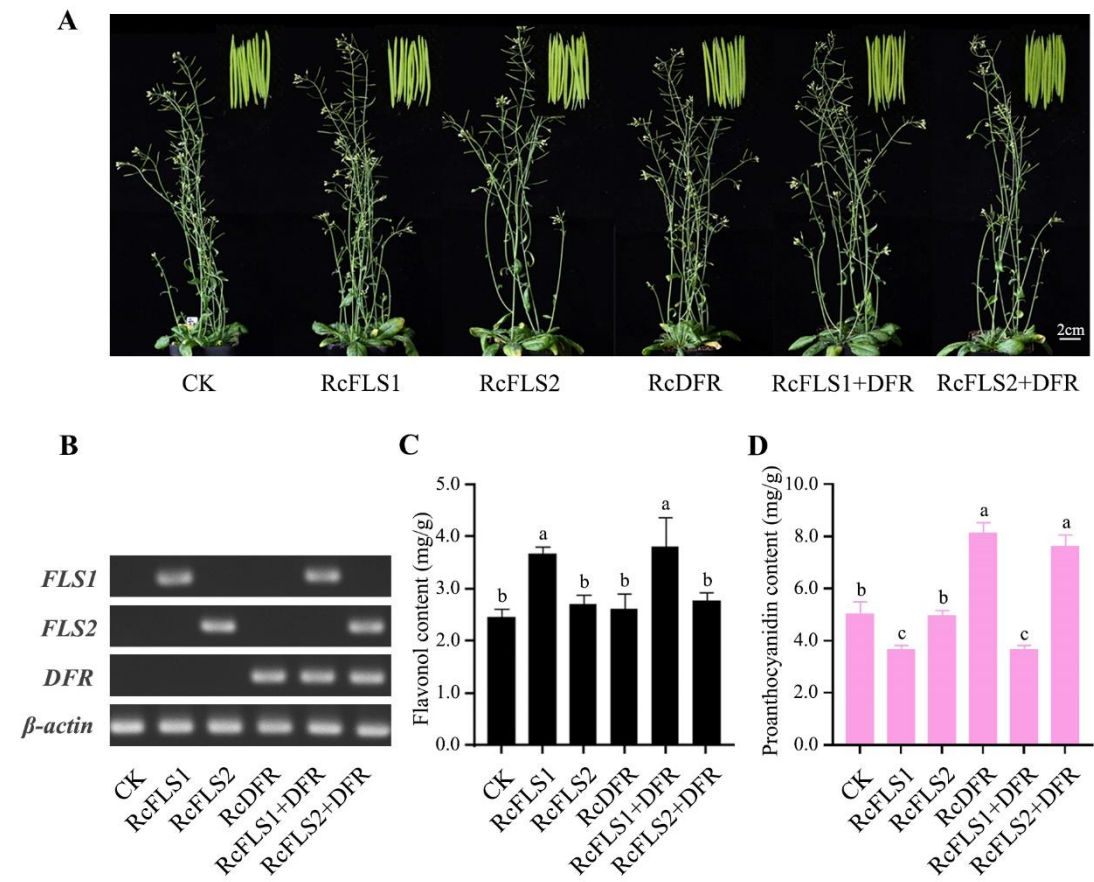

**Figure S6. Assays of competition between RcFLSs and RcDFR in *Arabidopsis thaliana*.**

(A) Phenotypes of transgenic *Arabidopsis* plants overexpressing *RcFLSs* and *RcDFR*. *Arabidopsis* green pods are shown in enlarged views. (B) Semiquantitative RT-PCR analysis of the transcription levels of *RcFLSs*, *RcDFR*, and housekeeping gene *β-actin*. (C) The content of flavonols extracted from transgenic *Arabidopsis* green pods. (D) The content of PA extracted from transgenic *Arabidopsis* green pods. Error bars indicate  $\pm$  SD from three repeats. Statistical significance was determined by one-way ANOVA with post hoc Tukey's tests ( $P < 0.05$ ) and indicated by letters.
